# Supplementary material for: Expedient synthesis of a pentasaccharide related to the O-specific polysaccharide of Escherichia coli O117:K98:H4 strain
Source: Royal Society of Chemistry journal article supplement (doi:10.1039/c4ra10538a), 2014-01-01
Supplement: c4ra10538a1.pdf [file c4ra10538a1.pdf]

## Supporting Information

### **Expedient synthesis of a pentasaccharide related to the *O*-specific polysaccharide of *Escherichia coli* O117:K98:H4 strain**

Ishani Bhaumik and Anup Kumar Misra\*

Bose Institute, Division of Molecular Medicine, P-1/12, C.I.T. Scheme VII-M, Kolkata-700054, India; Fax: 91-33-2355 3886; Tel: 91 33-2569 3240; E-mail: [akmisra69@gmail.com](mailto:akmisra69@gmail.com)

#### **Index**

| <b>Subject</b>                                                                                            | <b>Page No.</b> |
|-----------------------------------------------------------------------------------------------------------|-----------------|
| 1D and 2D NMR spectra of compounds <b>2, 8, 9, 10, acetylated 10, 11, 12, 13</b><br>and compound <b>1</b> | <b>2-18</b>     |

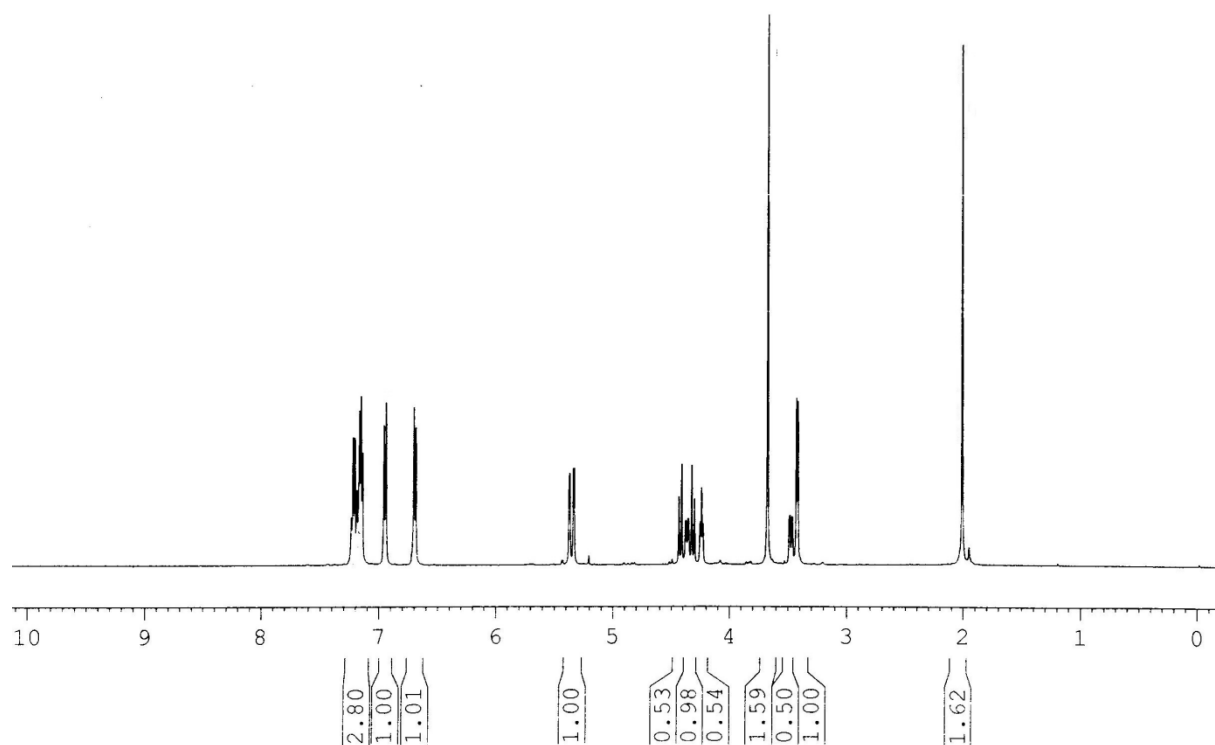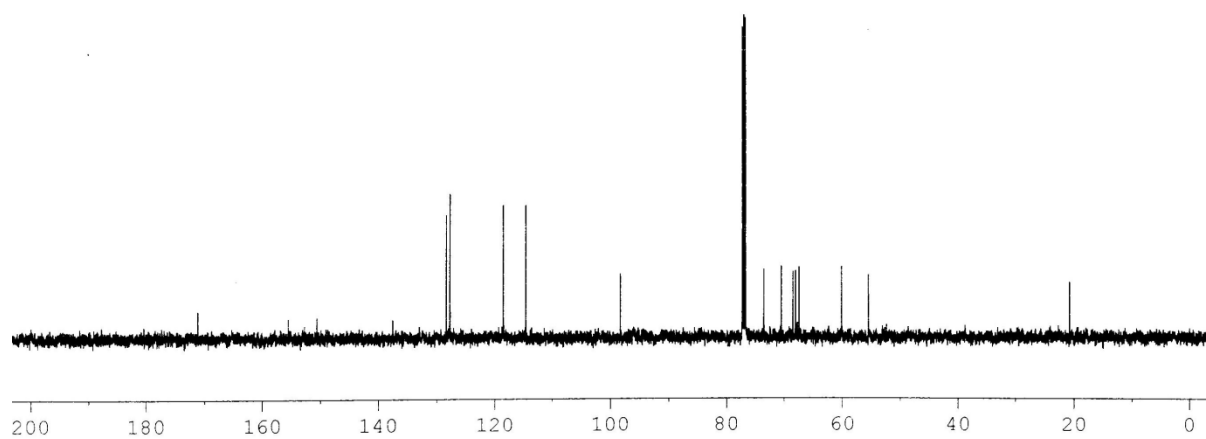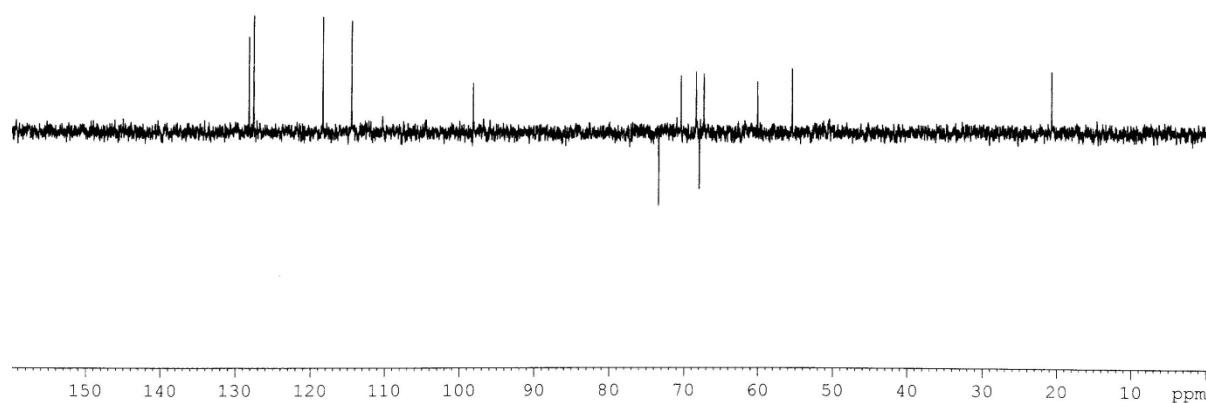

<sup>1</sup>H, <sup>13</sup>C and DEPT 135 NMR spectra of *p*-methoxyphenyl 4-*O*-acetyl-2-azido-6-*O*-benzyl-2-deoxy- $\alpha$ -D-galactopyranoside (**2**) (CDCl<sub>3</sub>).

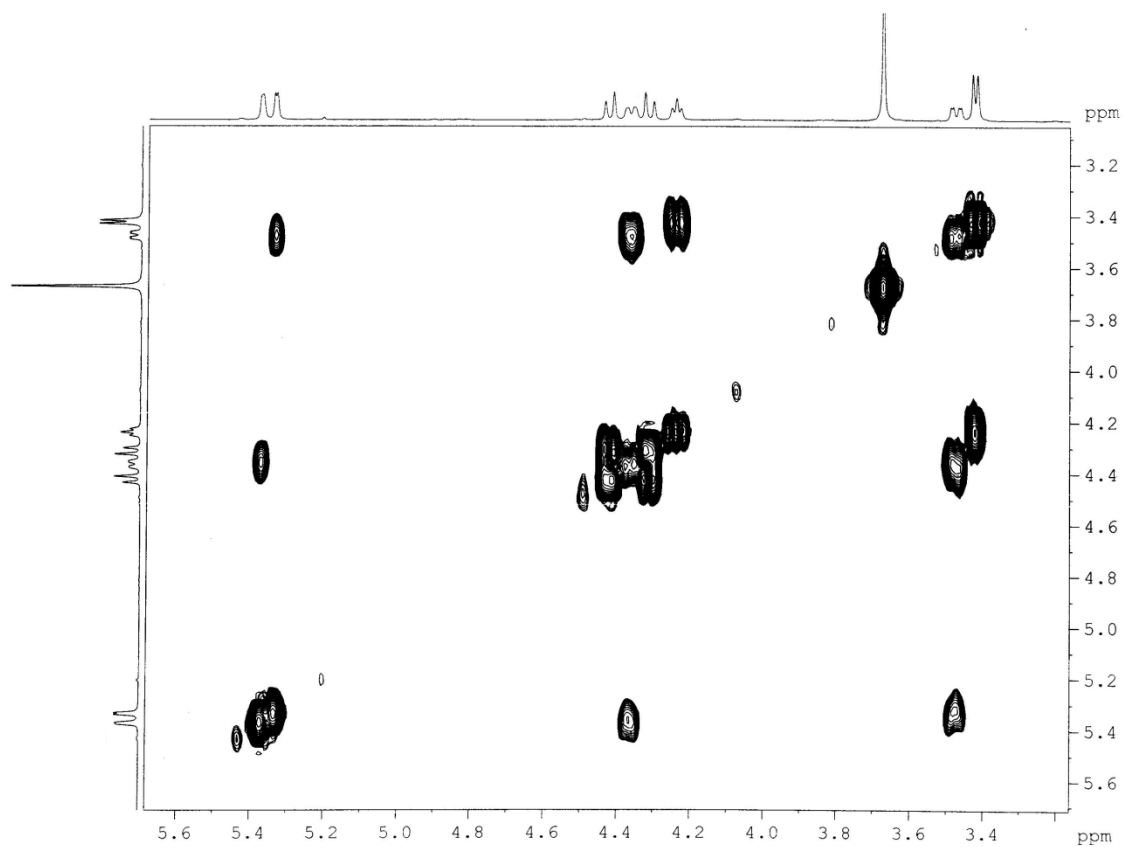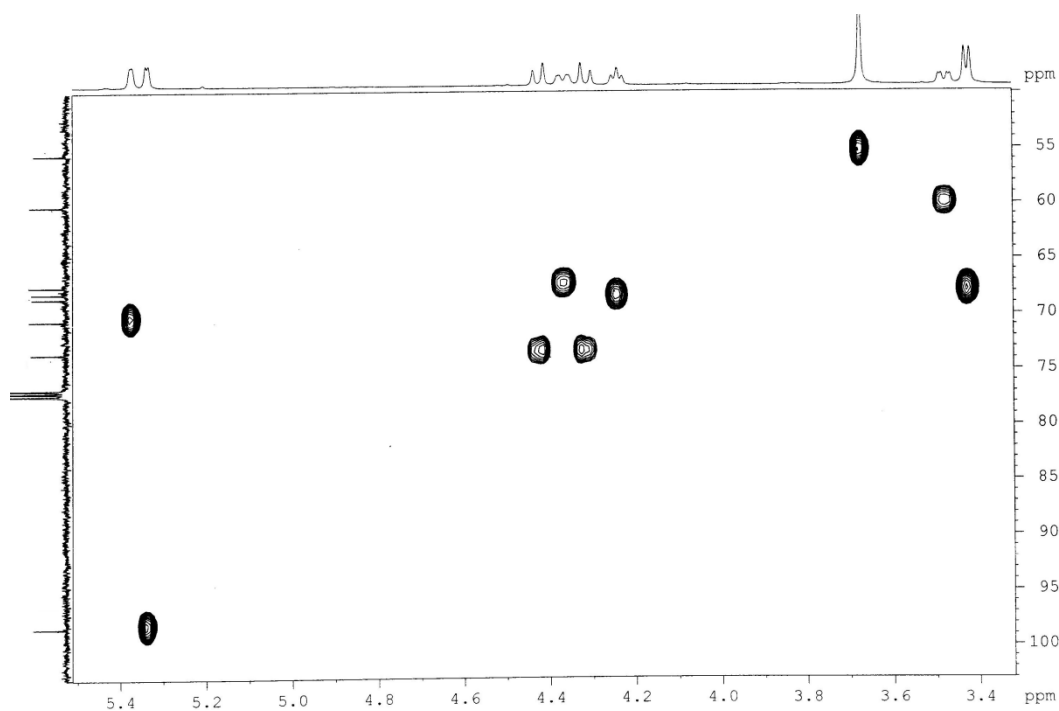

2D COSY and HSQC spectra of *p*-methoxyphenyl 4-*O*-acetyl-2-azido-6-*O*-benzyl-2-deoxy- $\alpha$ -D-galactopyranoside (**2**) (CDCl<sub>3</sub>) (selected regions).

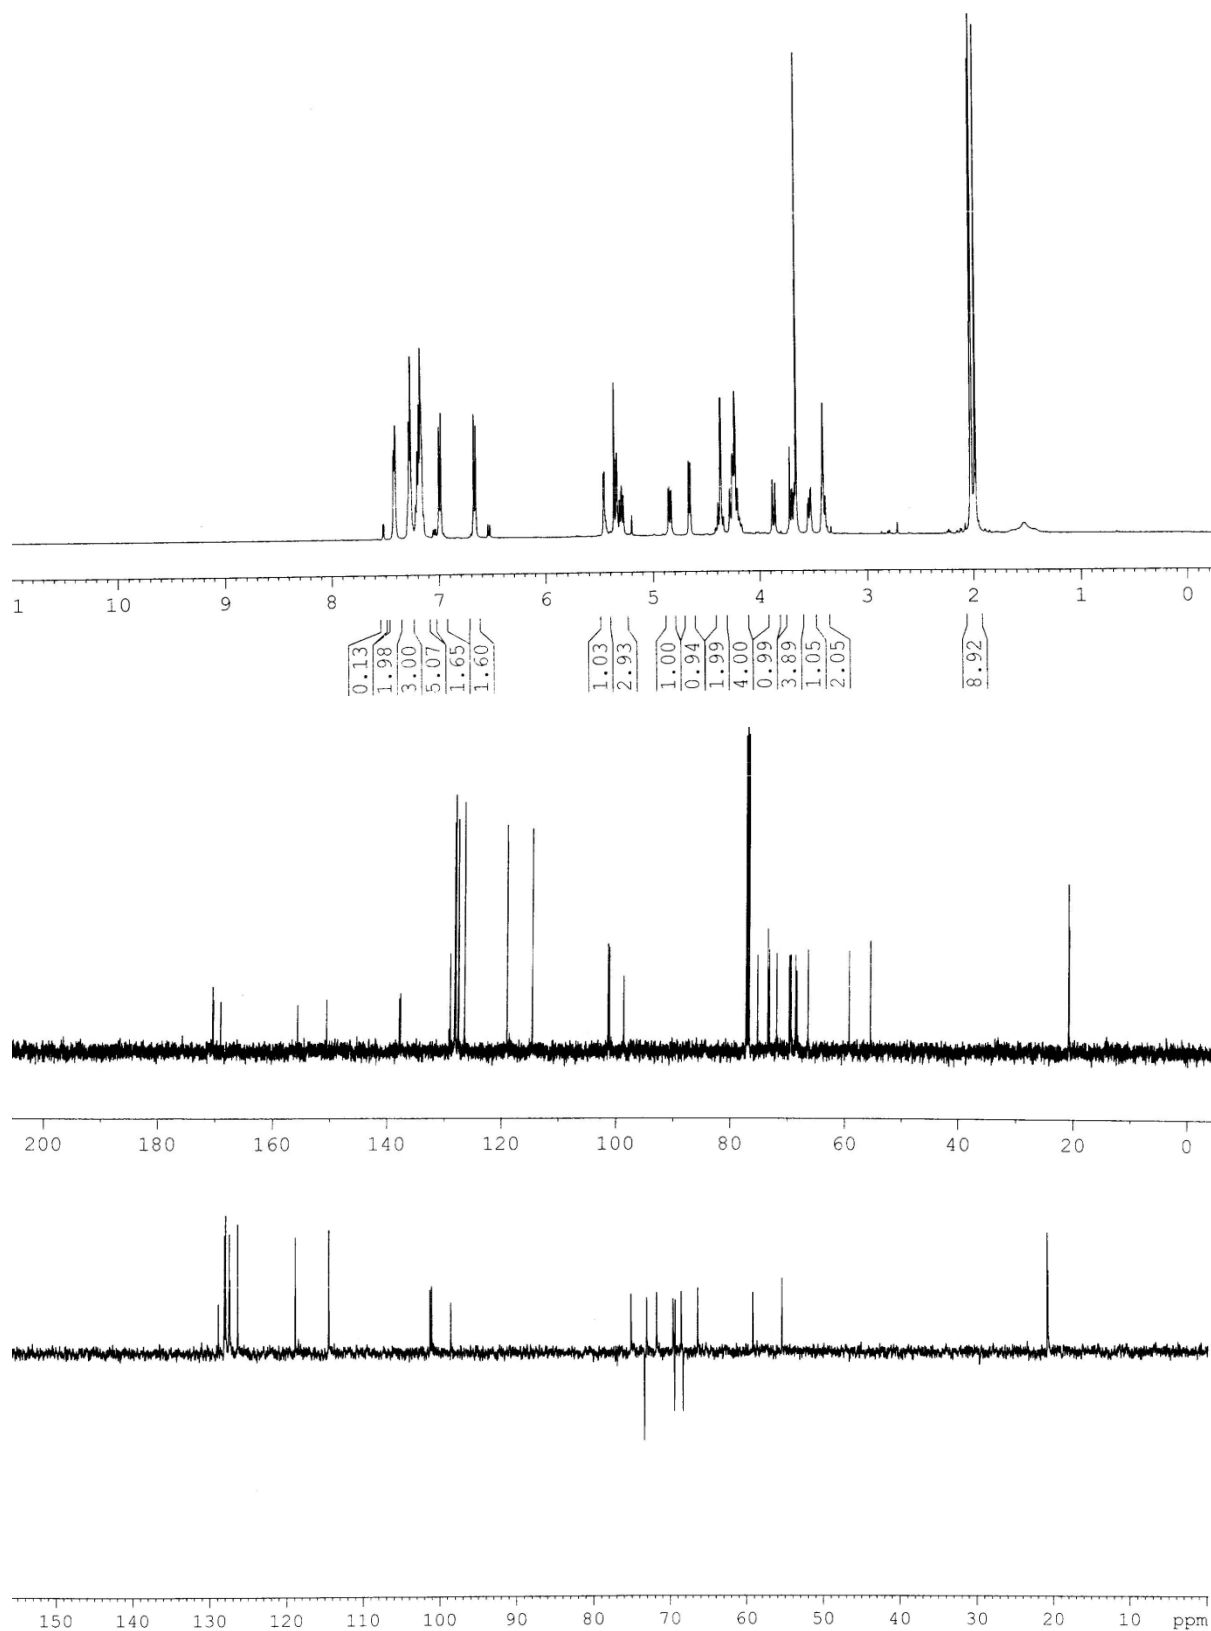

$^1\text{H}$ ,  $^{13}\text{C}$  and DEPT 135 NMR spectra of *p*-methoxyphenyl (2,3-di-*O*-acetyl-4,6-*O*-benzylidene- $\beta$ -D-galactopyranosyl)-(1 $\rightarrow$ 3)-4-*O*-acetyl-2-azido-6-*O*-benzyl-2-deoxy- $\alpha$ -D-galactopyranoside (**8**) ( $\text{CDCl}_3$ ).

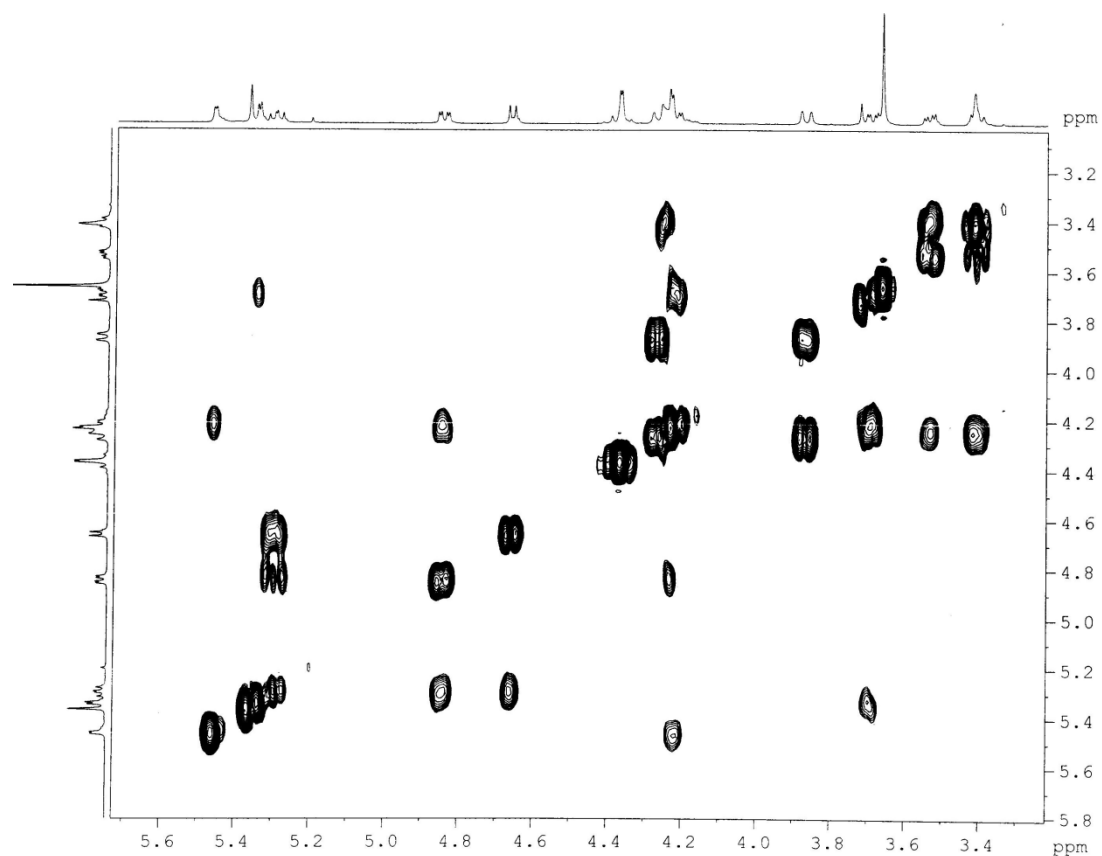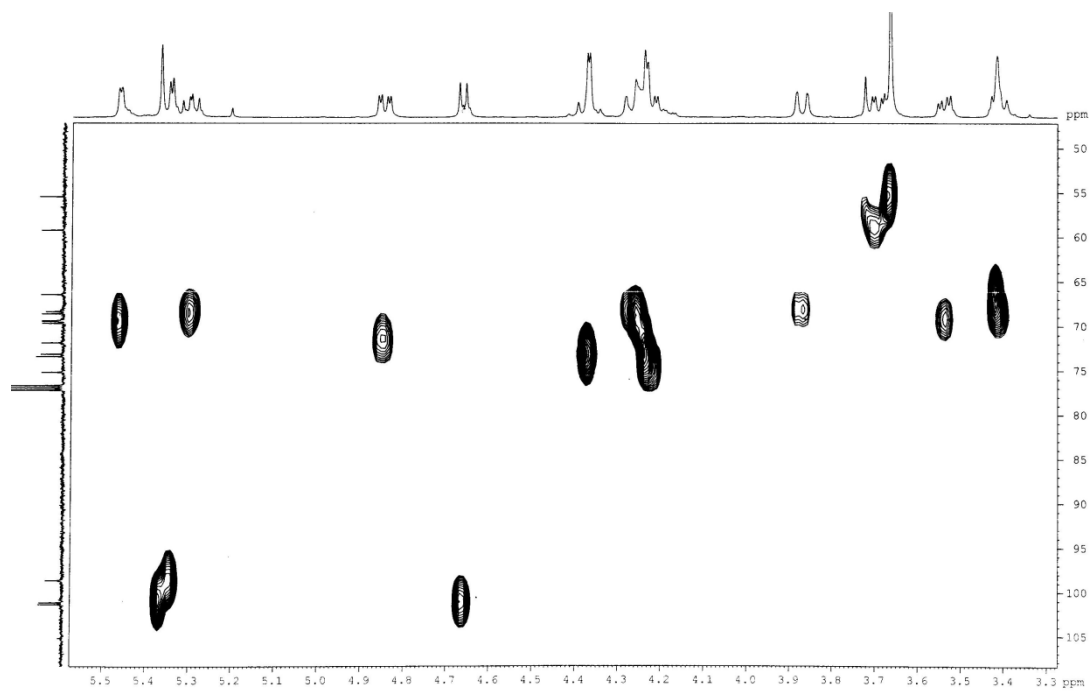

2D COSY and HSQC spectra of *p*-methoxyphenyl (2,3-di-*O*-acetyl-4,6-*O*-benzylidene- $\beta$ -D-galactopyranosyl)-(1 $\rightarrow$ 3)-4-*O*-acetyl-2-azido-6-*O*-benzyl-2-deoxy- $\alpha$ -D-galactopyranoside (**8**) (CDCl<sub>3</sub>) (selected regions).

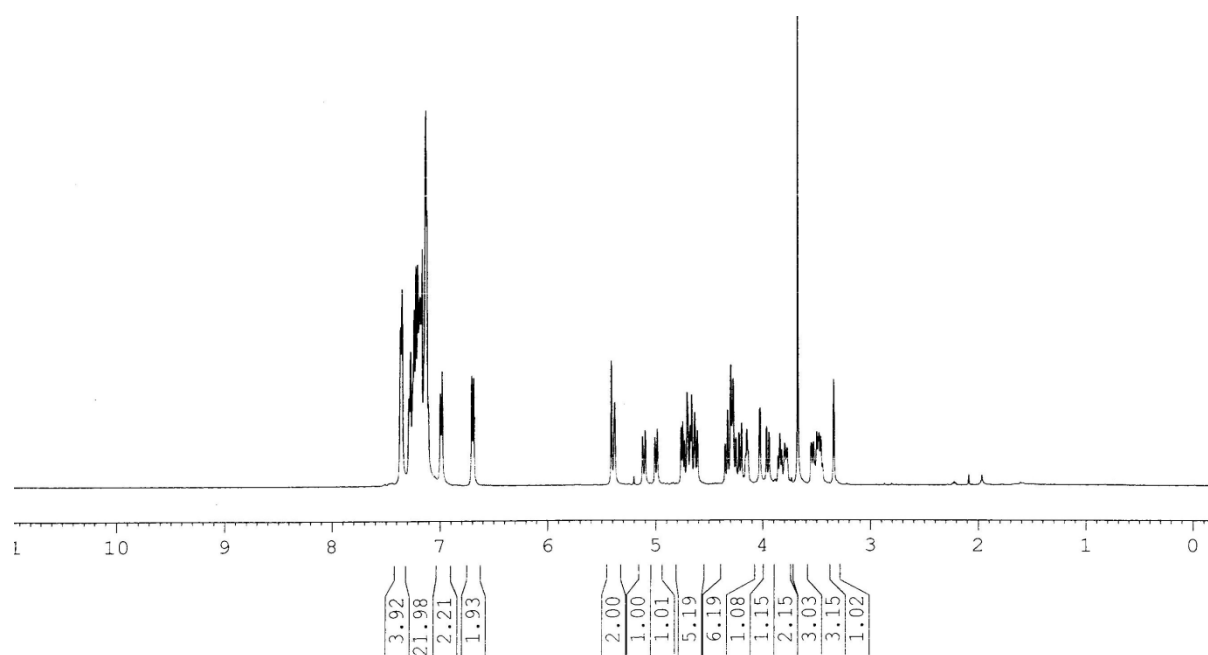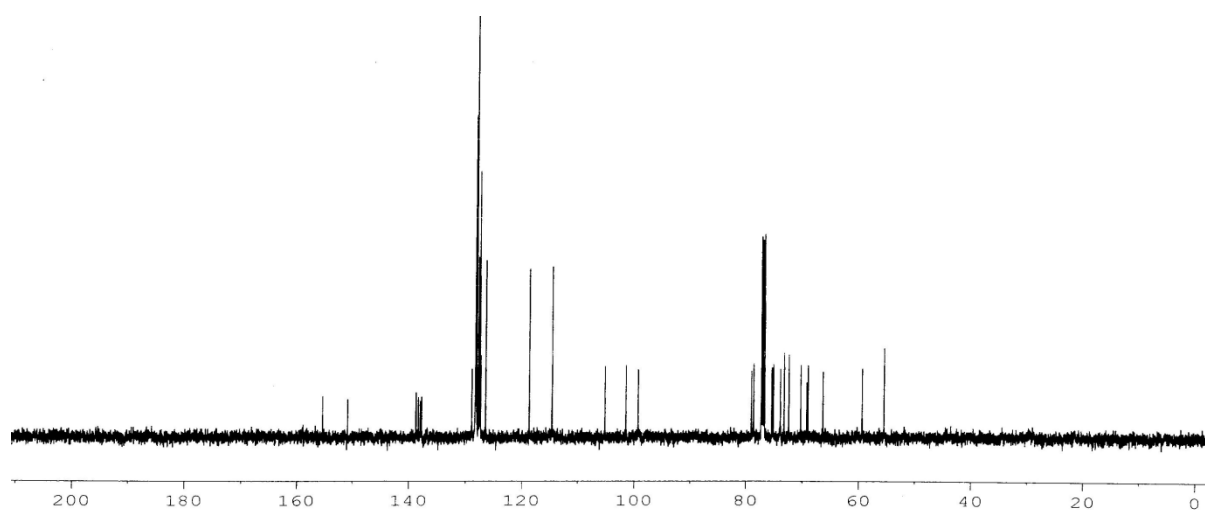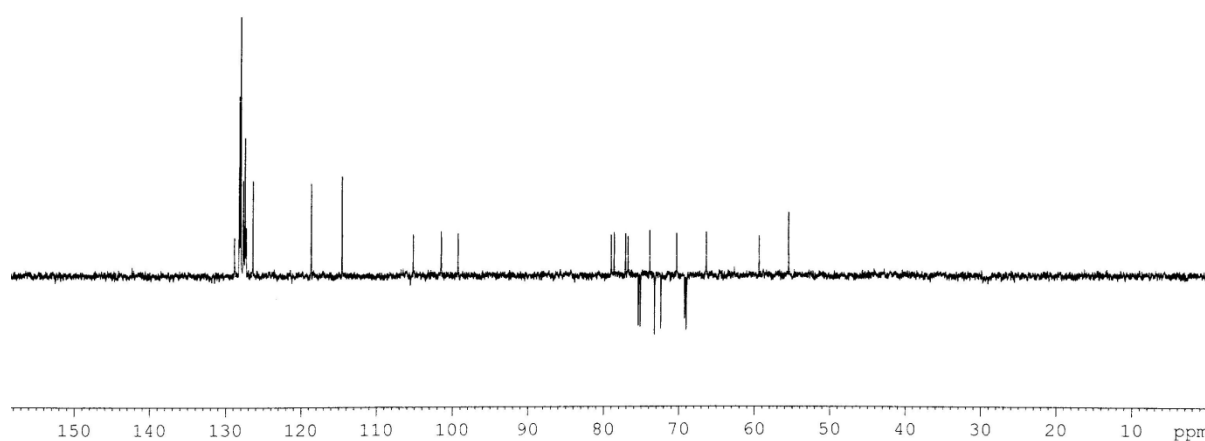

<sup>1</sup>H, <sup>13</sup>C and DEPT 135 NMR spectra of *p*-methoxyphenyl (2,3-di-*O*-benzyl-4,6-*O*-benzylidene-β-D-galactopyranosyl)-(1→3)-2-azido-4,6-di-*O*-benzyl-2-deoxy-α-D-galactopyranoside (**9**) (CDCl<sub>3</sub>).

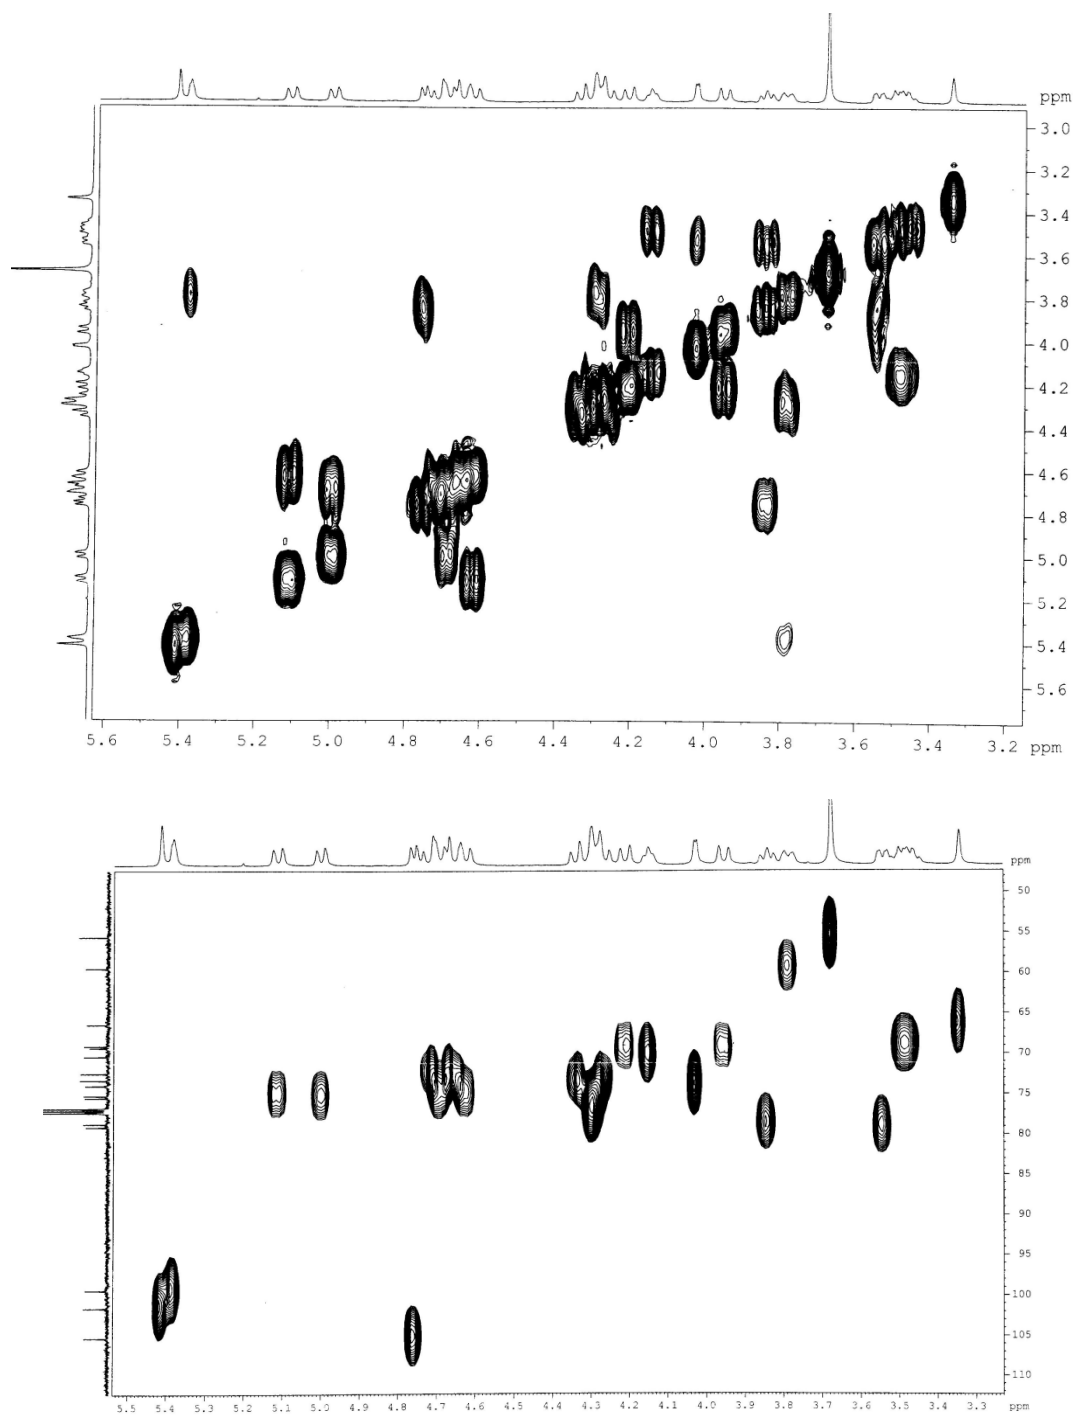

2D COSY and HSQC spectra of *p*-methoxyphenyl (2,3-di-*O*-benzyl-4,6-*O*-benzylidene- $\beta$ -D-galactopyranosyl)-(1 $\rightarrow$ 3)-2-azido-4,6-di-*O*-benzyl-2-deoxy- $\alpha$ -D-galactopyranoside (**9**) (CDCl<sub>3</sub>) (selected regions).

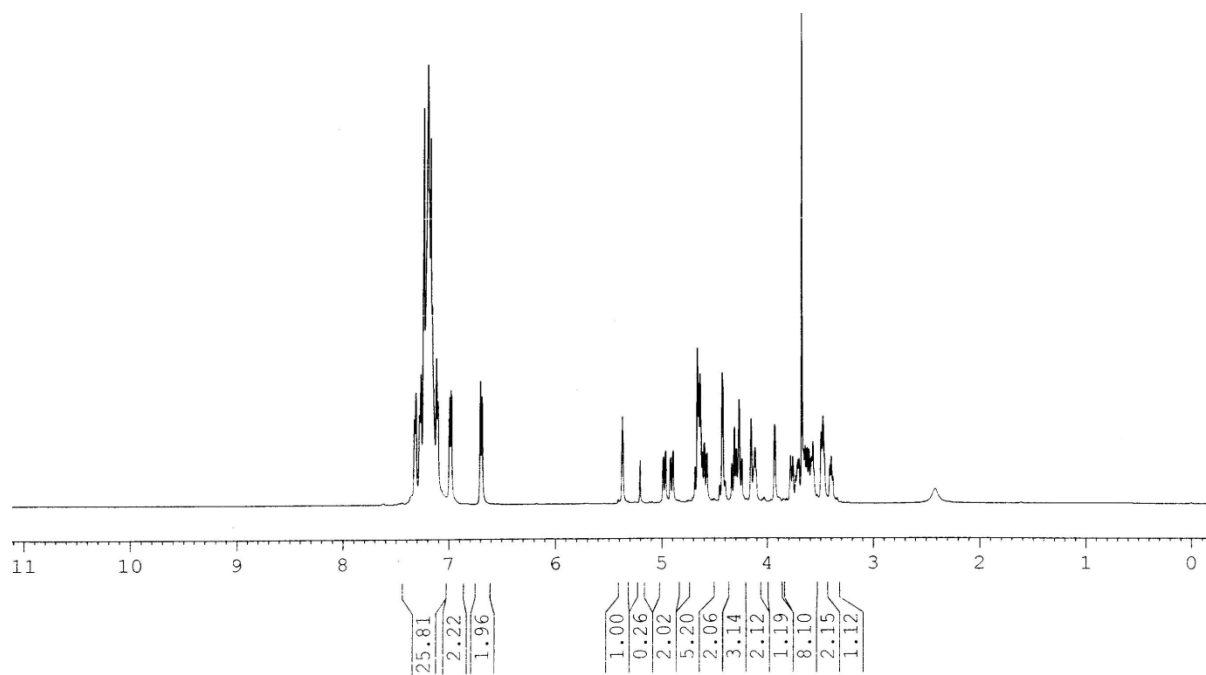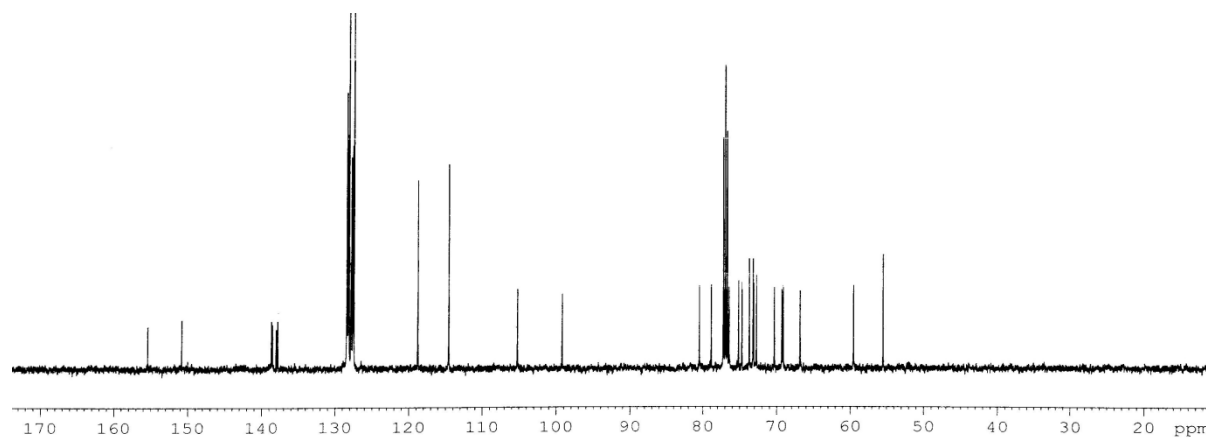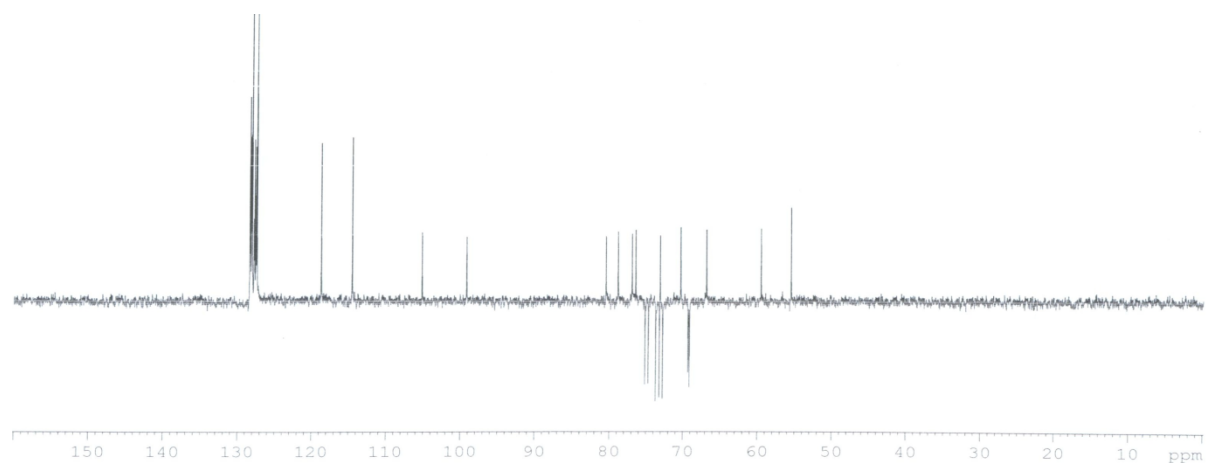

<sup>1</sup>H, <sup>13</sup>C and DEPT 135 NMR spectra of *p*-methoxyphenyl (2,3,6-tri-*O*-benzyl-β-D-galactopyranosyl)-(1→3)-2-azido-4,6-di-*O*-benzyl-2-deoxy-α-D-galactopyranoside (**10**) (CDCl<sub>3</sub>).



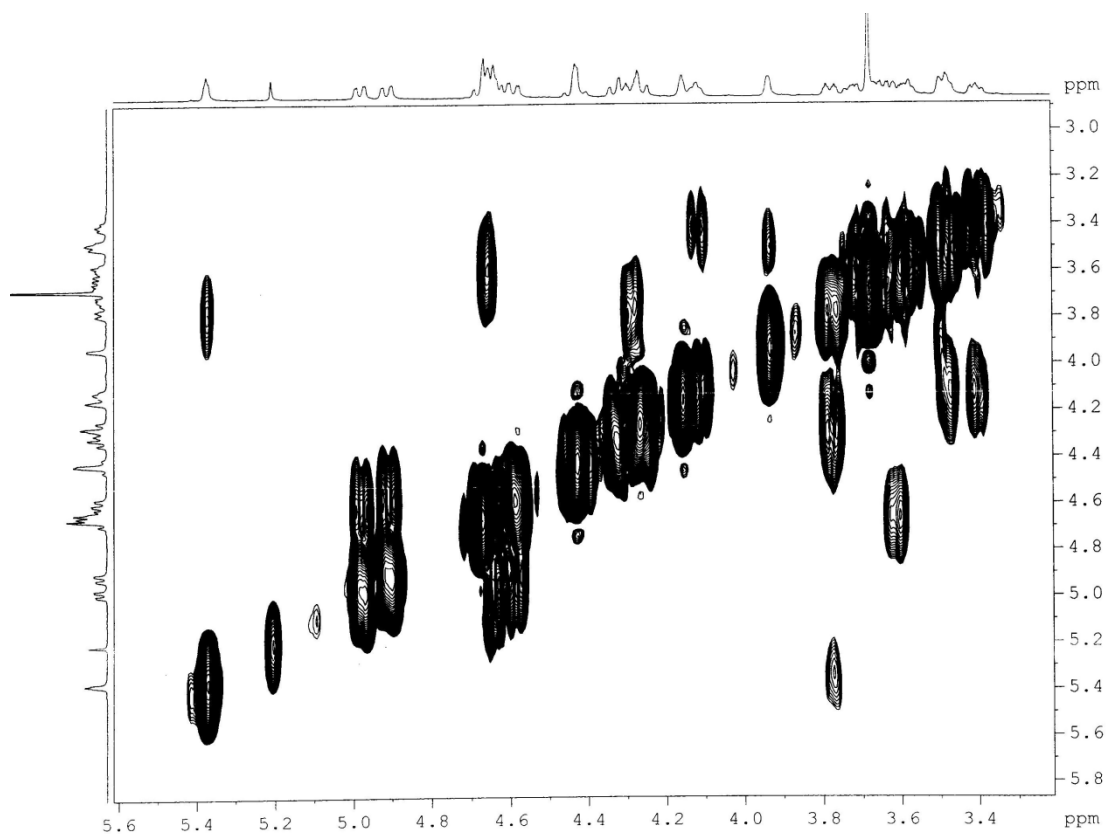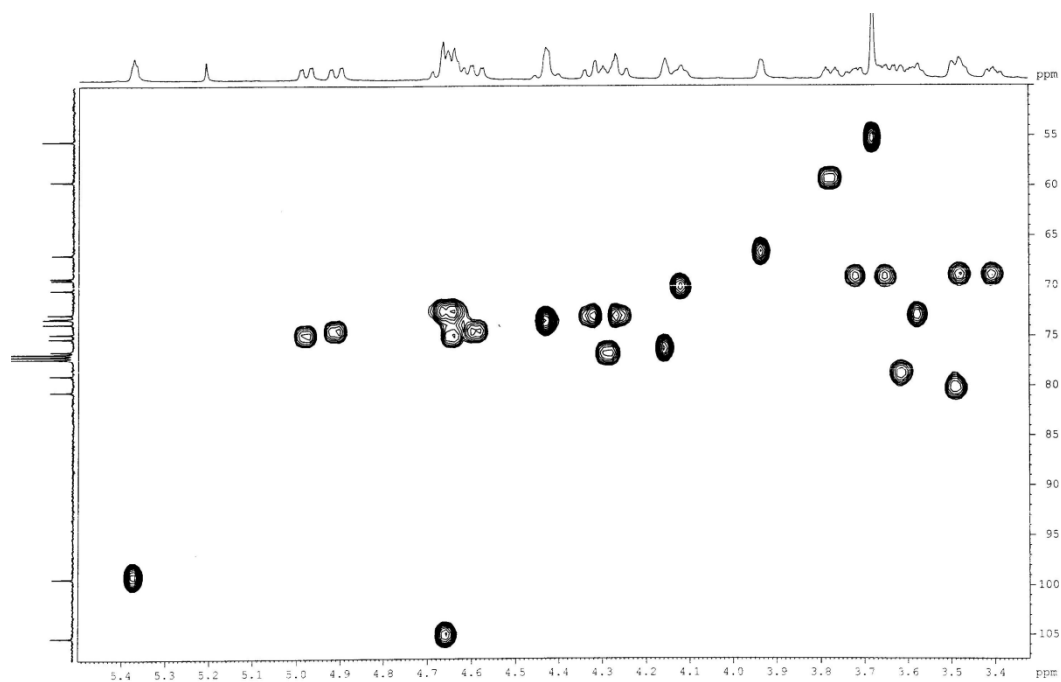

2D COSY and HSQC spectra of *p*-methoxyphenyl (2,3,6-tri-*O*-benzyl- $\beta$ -D-galactopyranosyl)-(1 $\rightarrow$ 3)-2-azido-4,6-di-*O*-benzyl-2-deoxy- $\alpha$ -D-galactopyranoside (**10**) (CDCl<sub>3</sub>) (selected regions).

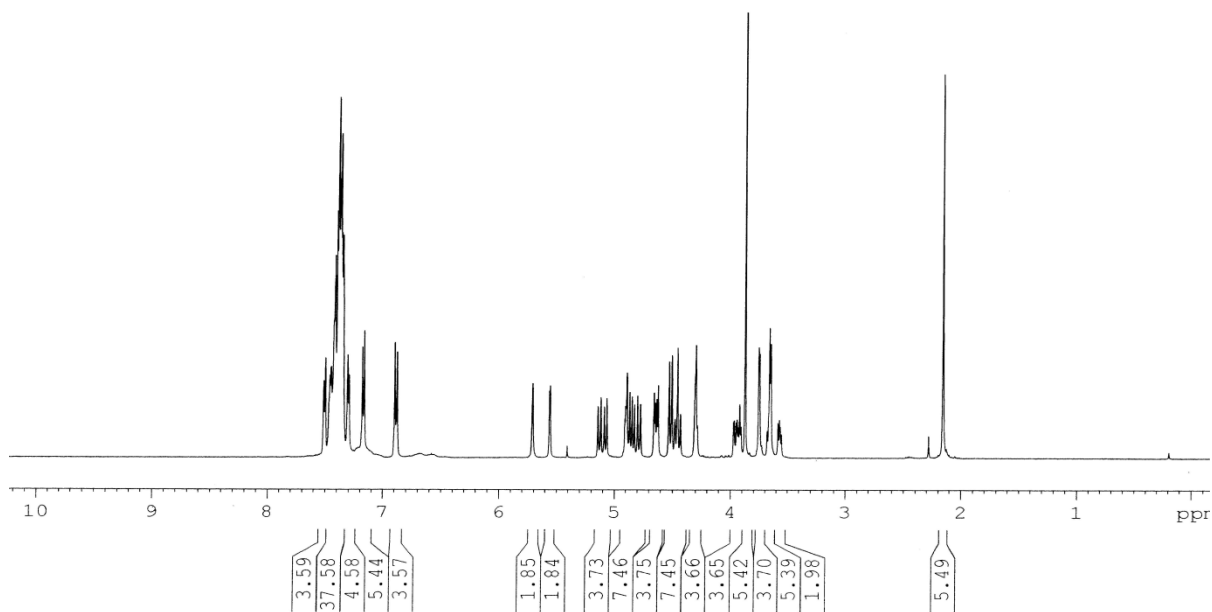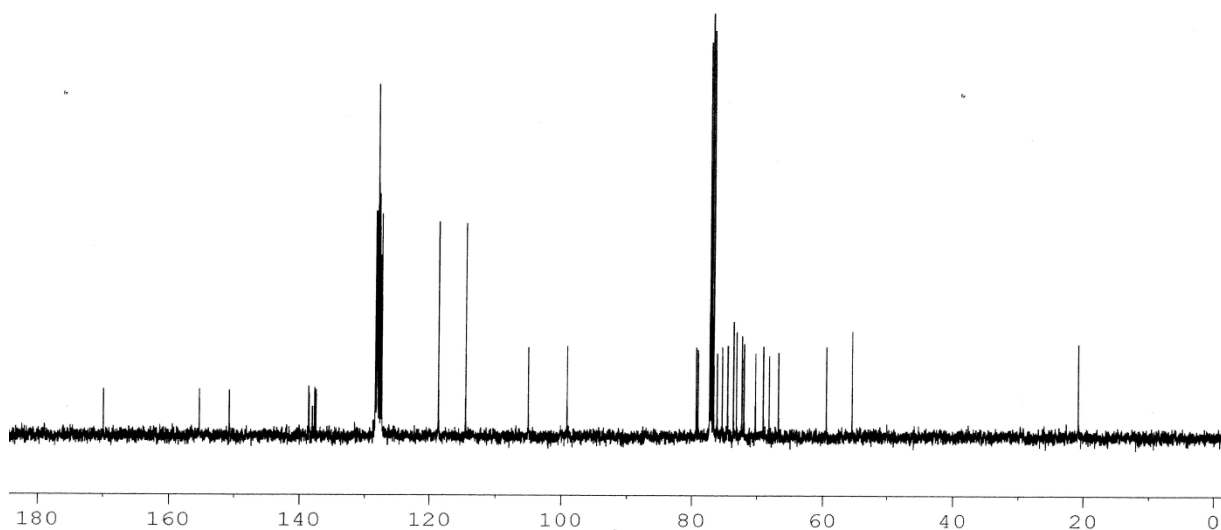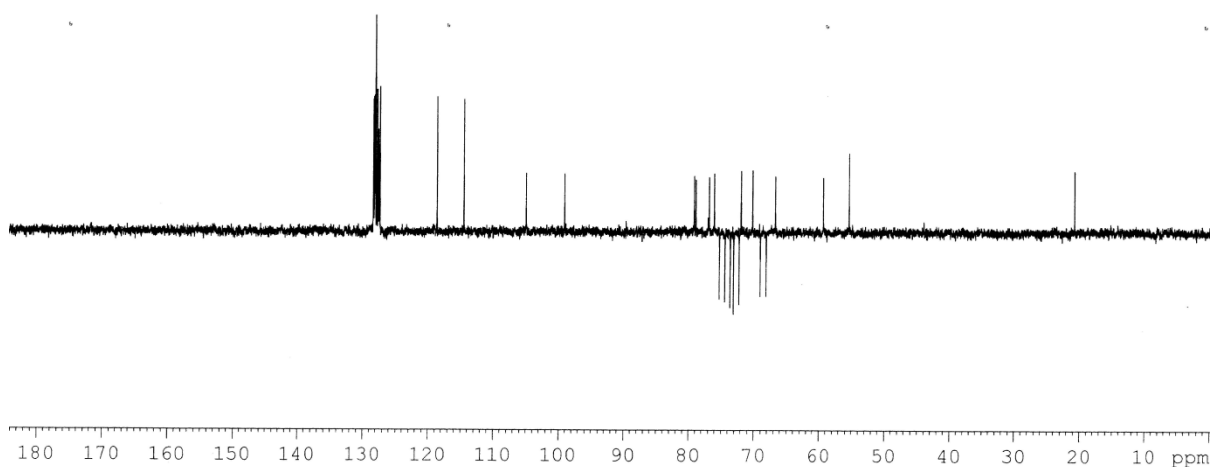

$^1\text{H}$ ,  $^{13}\text{C}$  and DEPT 135 NMR spectra of *p*-methoxyphenyl (4-*O*-acetyl-2,3,6-tri-*O*-benzyl- $\beta$ -D-galactopyranosyl)-(1 $\rightarrow$ 3)-2-azido-4,6-di-*O*-benzyl-2-deoxy- $\alpha$ -D-galactopyranoside (**10**) ( $\text{CDCl}_3$ ) (acetylated compound **10**).

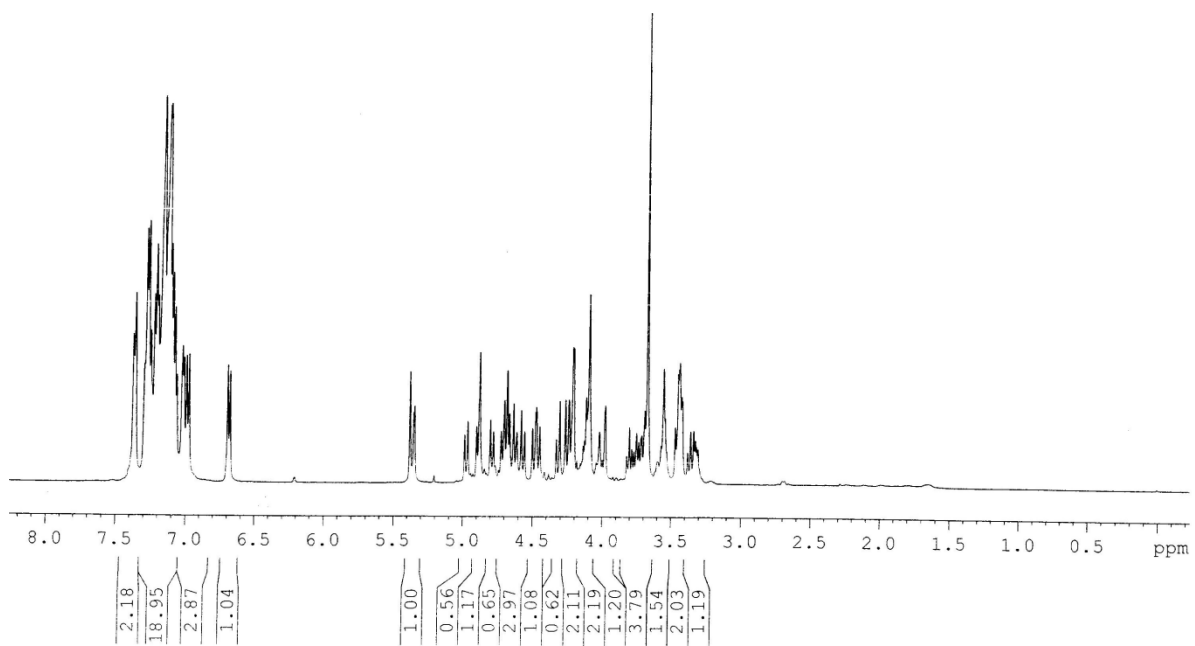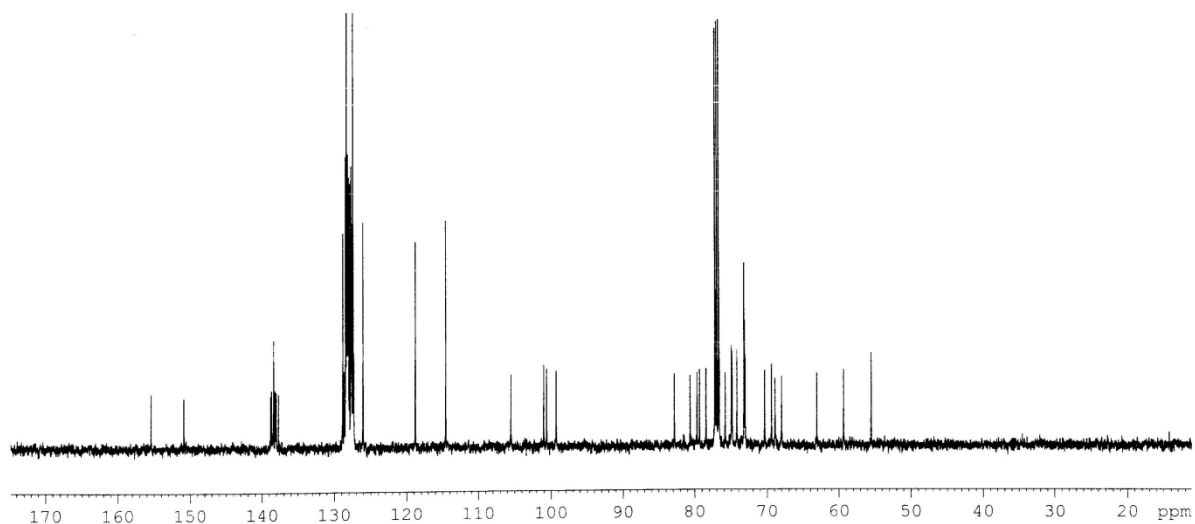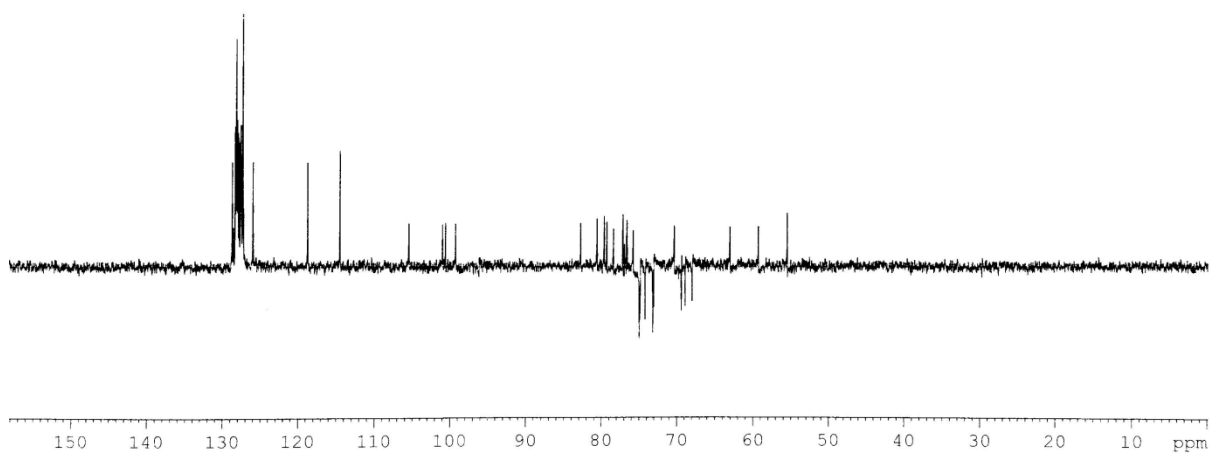

<sup>1</sup>H, <sup>13</sup>C and DEPT 135 NMR spectra of *p*-methoxyphenyl (2,3-di-*O*-benzyl-4,6-*O*-benzylidene- $\alpha$ -D-glucopyranosyl)-(1 $\rightarrow$ 4)-(2,3,6-tri-*O*-benzyl- $\beta$ -D-galactopyranosyl)-(1 $\rightarrow$ 3)-2-azido-4,6-di-*O*-benzyl-2-deoxy- $\alpha$ -D-galactopyranoside (**11**) (CDCl<sub>3</sub>).

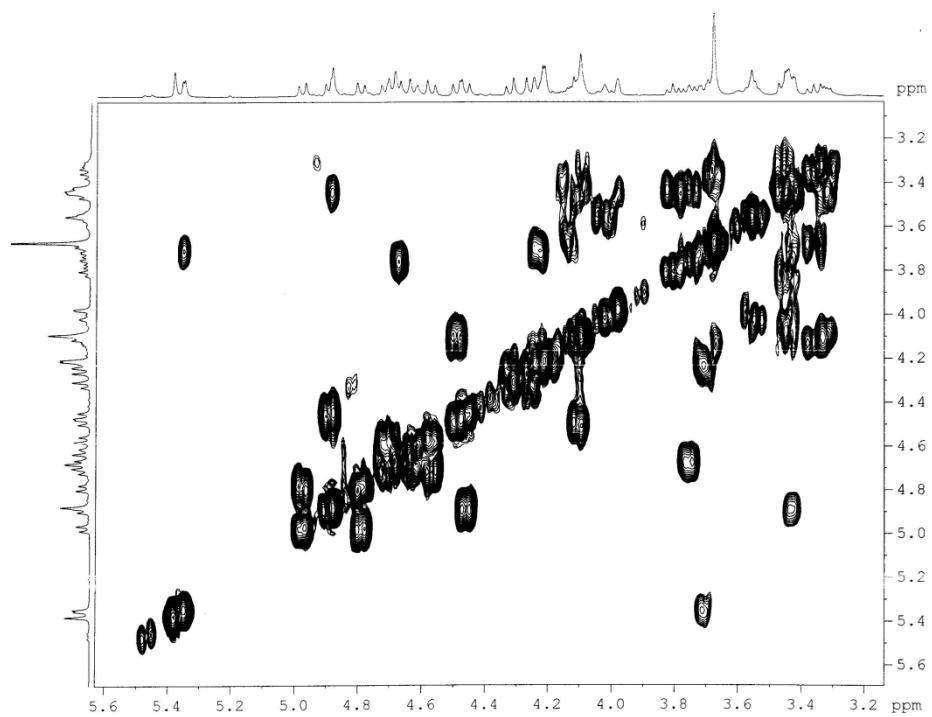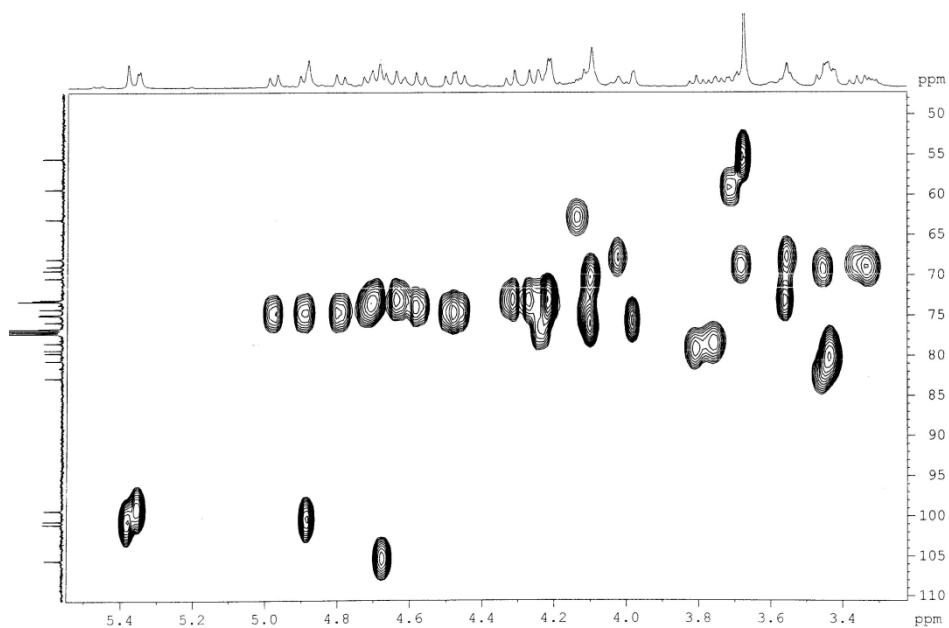

2D COSY and HSQC spectra of *p*-methoxyphenyl (2,3-di-*O*-benzyl-4,6-*O*-benzylidene- $\alpha$ -D-glucopyranosyl)-(1 $\rightarrow$ 4)-(2,3,6-tri-*O*-benzyl- $\beta$ -D-galactopyranosyl)-(1 $\rightarrow$ 3)-2-azido-4,6-di-*O*-benzyl-2-deoxy- $\alpha$ -D-galactopyranoside (**11**) (CDCl<sub>3</sub>) (selected regions).

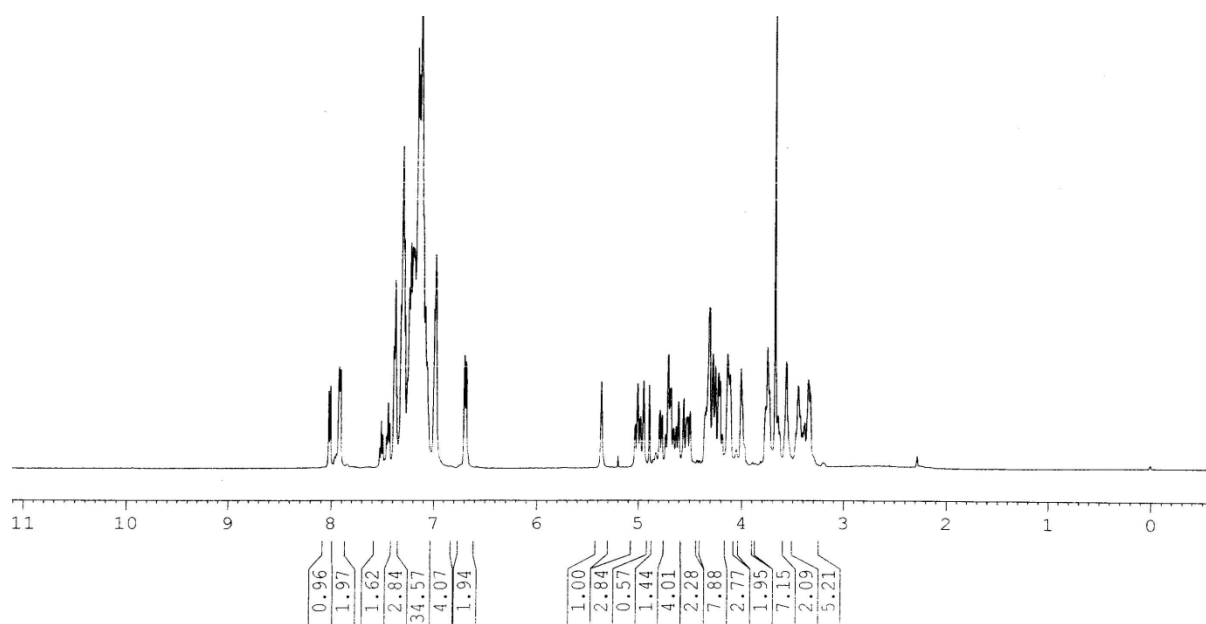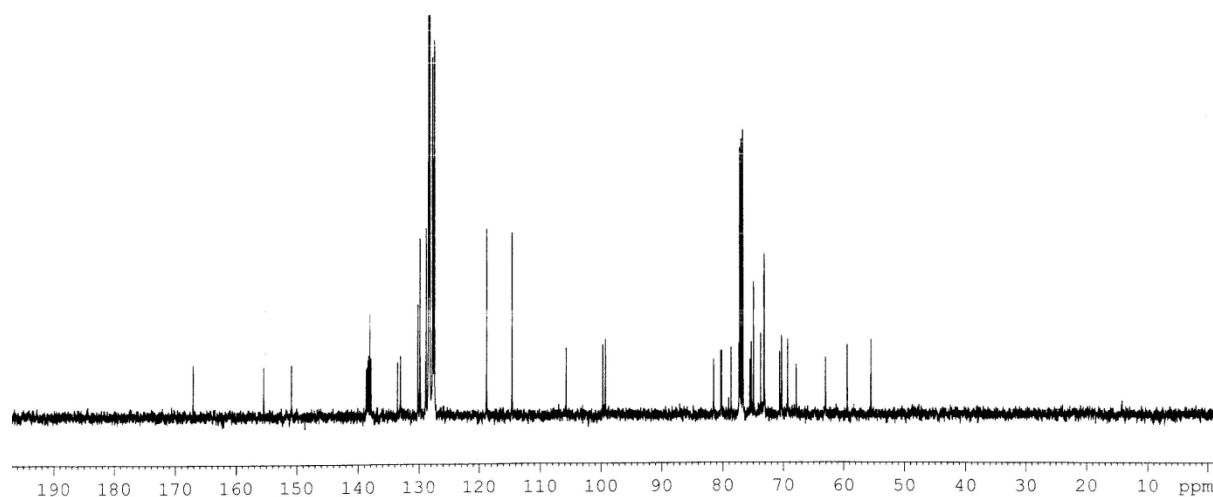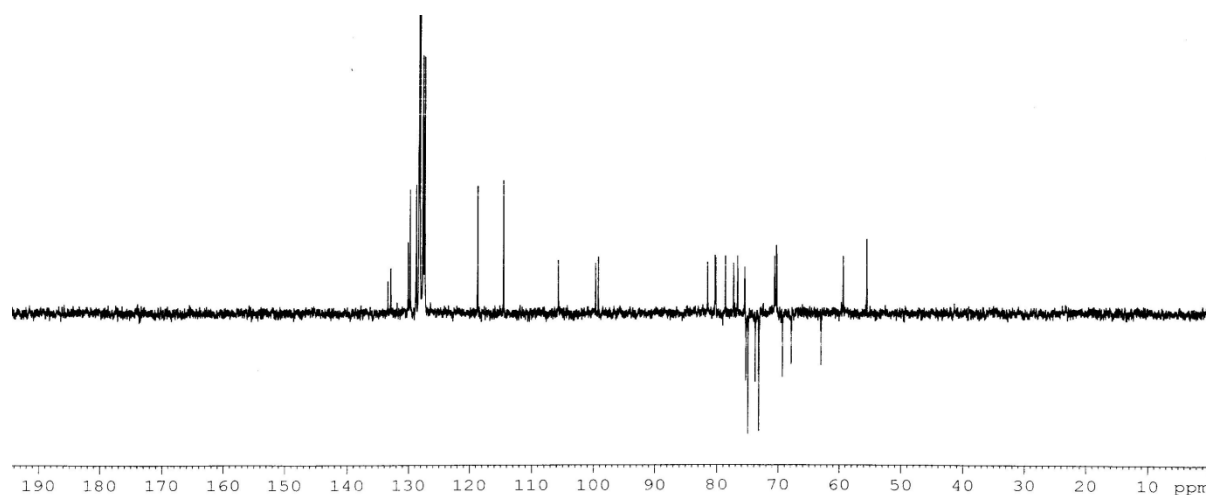

<sup>1</sup>H, <sup>13</sup>C and DEPT 135 NMR spectra of *p*-methoxyphenyl (6-*O*-benzoyl-2,3-di-*O*-benzyl- $\alpha$ -D-glucopyranosyl)-(1 $\rightarrow$ 4)-(2,3,6-tri-*O*-benzyl- $\beta$ -D-galactopyranosyl)-(1 $\rightarrow$ 3)-2-azido-4,6-di-*O*-benzyl-2-deoxy- $\alpha$ -D-galactopyranoside (**12**) (CDCl<sub>3</sub>).

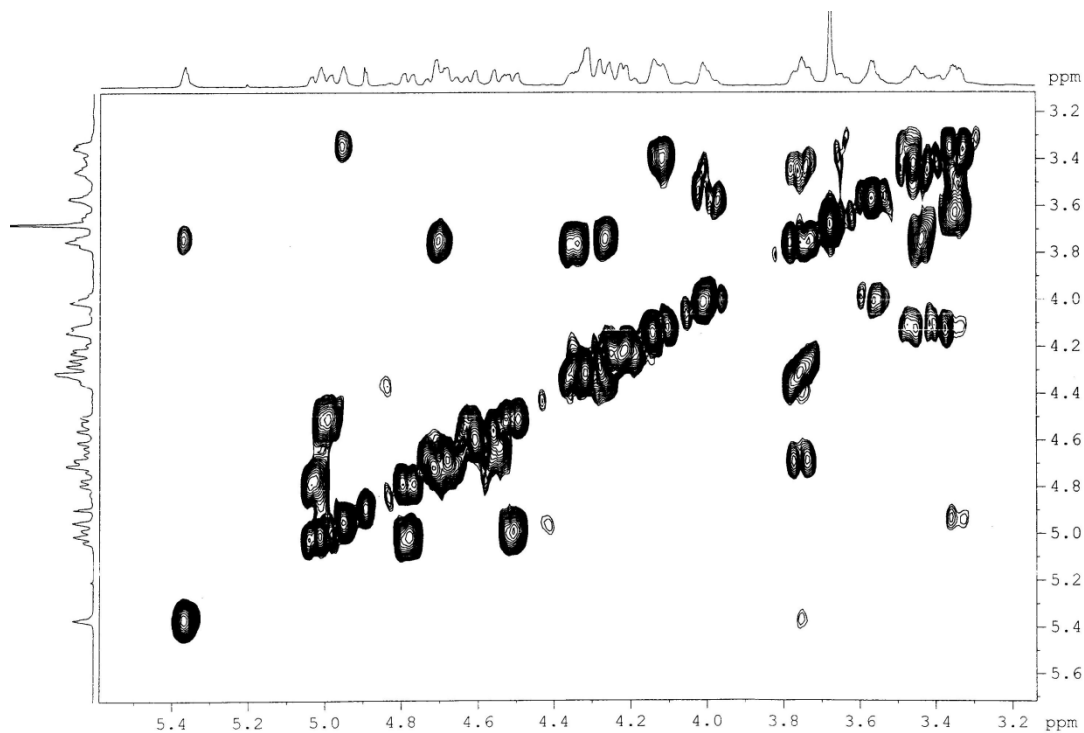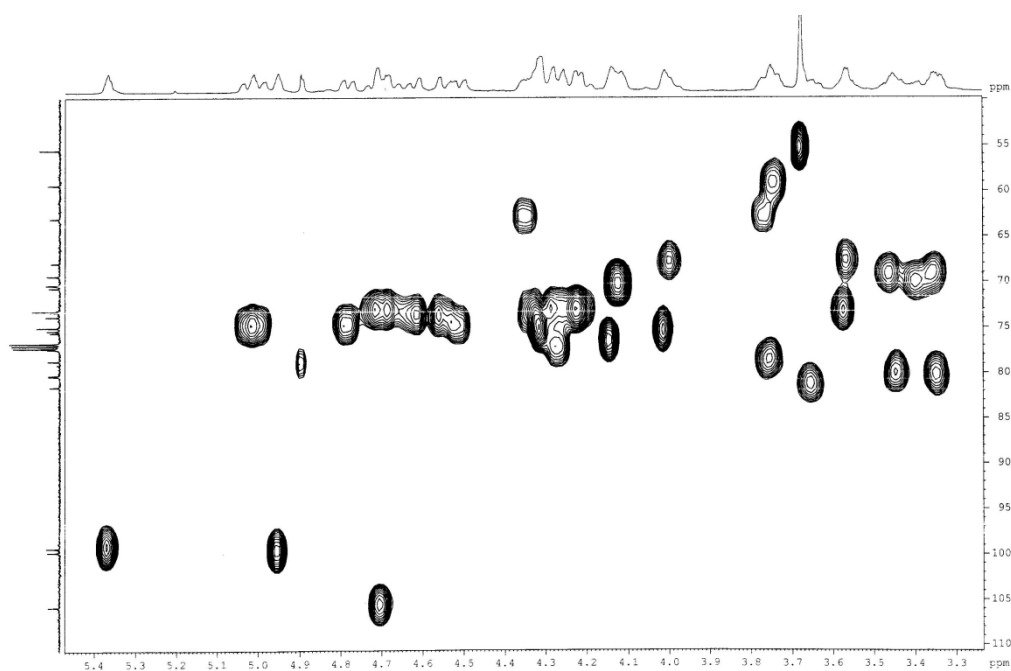

2D COSY and HSQC spectra of *p*-methoxyphenyl (6-*O*-benzoyl-2,3-di-*O*-benzyl- $\alpha$ -D-glucopyranosyl)-(1 $\rightarrow$ 4)-(2,3,6-tri-*O*-benzyl- $\beta$ -D-galactopyranosyl)-(1 $\rightarrow$ 3)-2-azido-4,6-di-*O*-benzyl-2-deoxy- $\alpha$ -D-galactopyranoside (**12**) (CDCl<sub>3</sub>) (selected regions).

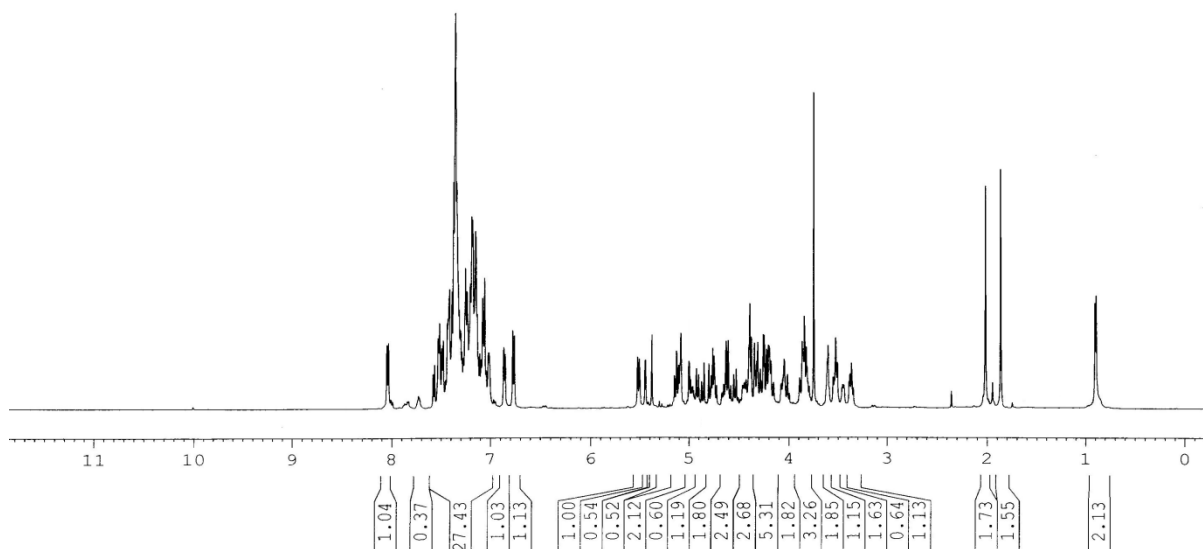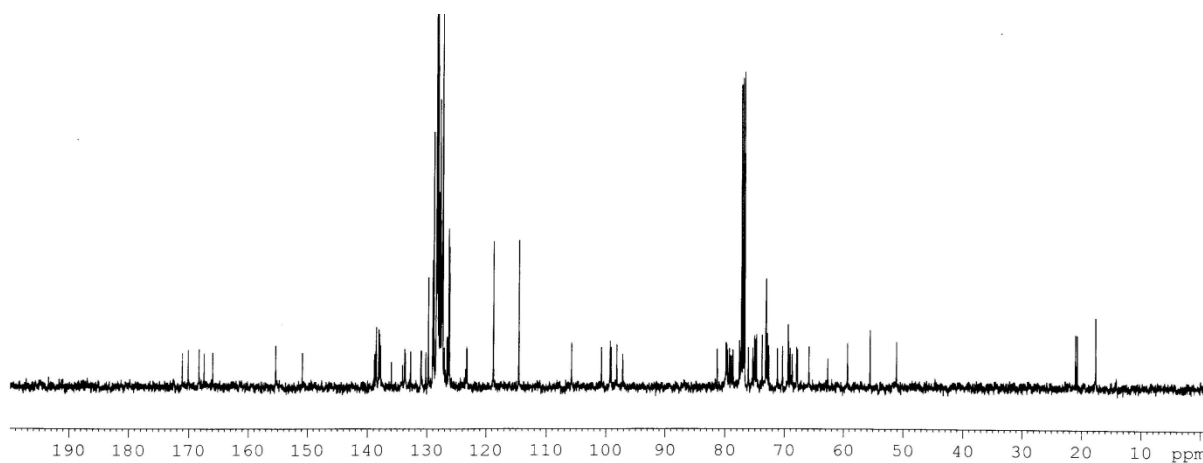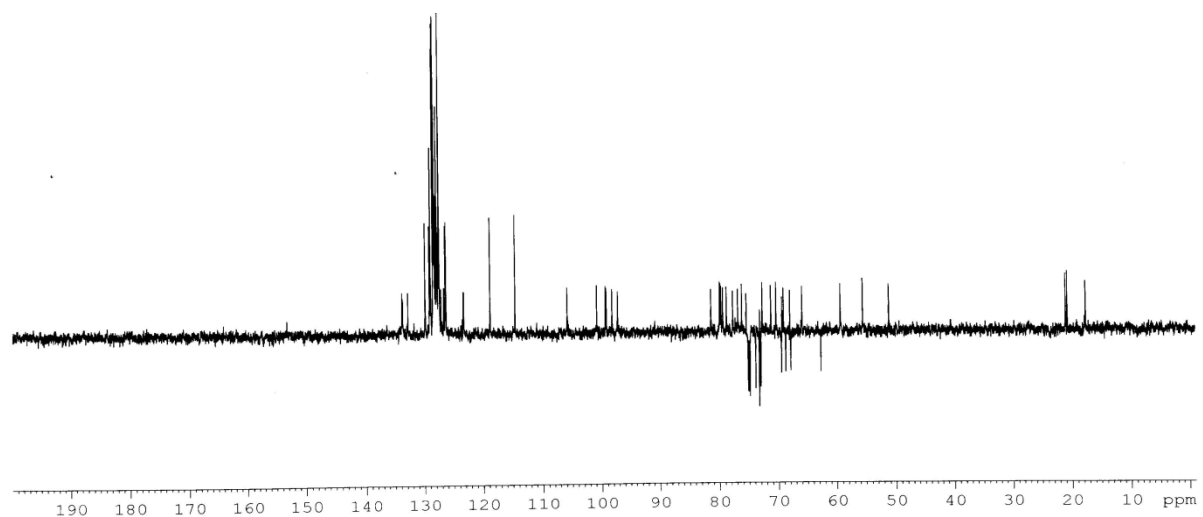

$^1\text{H}$ ,  $^{13}\text{C}$  and DEPT 135 NMR spectra of *p*-methoxyphenyl (3-*O*-acetyl-4,6-*O*-benzylidene-2-deoxy-2-phthalimido- $\beta$ -D-galactopyranosyl)-(1 $\rightarrow$ 3)-(2-*O*-acetyl-4-*O*-benzyl- $\alpha$ -L-rhamnopyranosyl)-(1 $\rightarrow$ 4)-(6-*O*-benzoyl-2,3-di-*O*-benzyl- $\alpha$ -D-glucopyranosyl)-(1 $\rightarrow$ 4)-(2,3,6-tri-*O*-benzyl- $\beta$ -D-galactopyranosyl)-(1 $\rightarrow$ 3)-2-azido-4,6-di-*O*-benzyl-2-deoxy- $\alpha$ -D-galactopyranoside (**13**) ( $\text{CDCl}_3$ ).

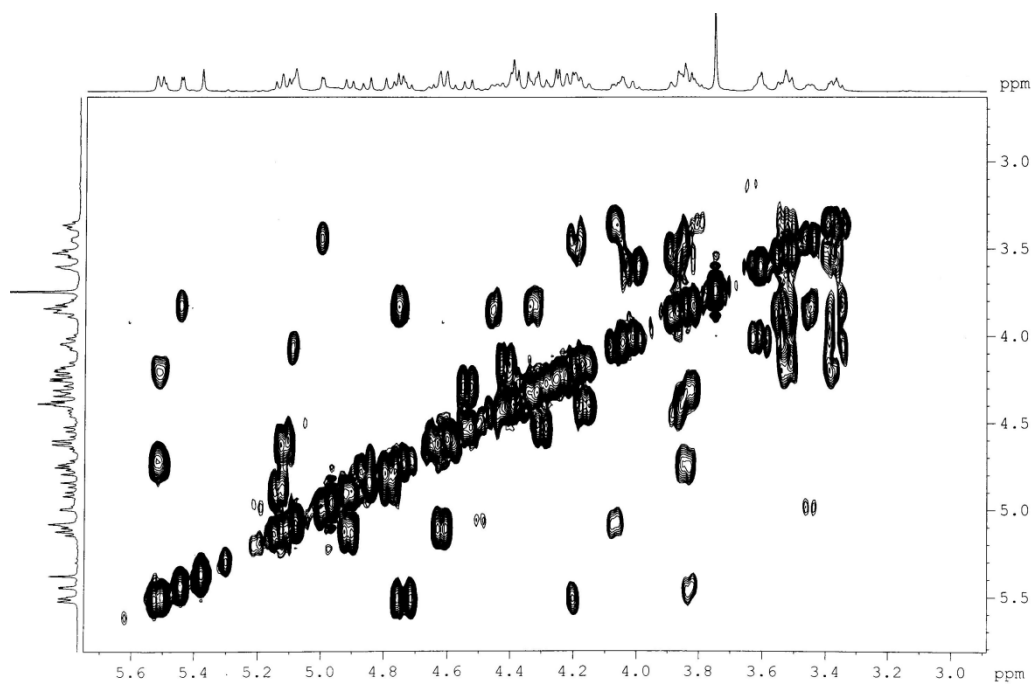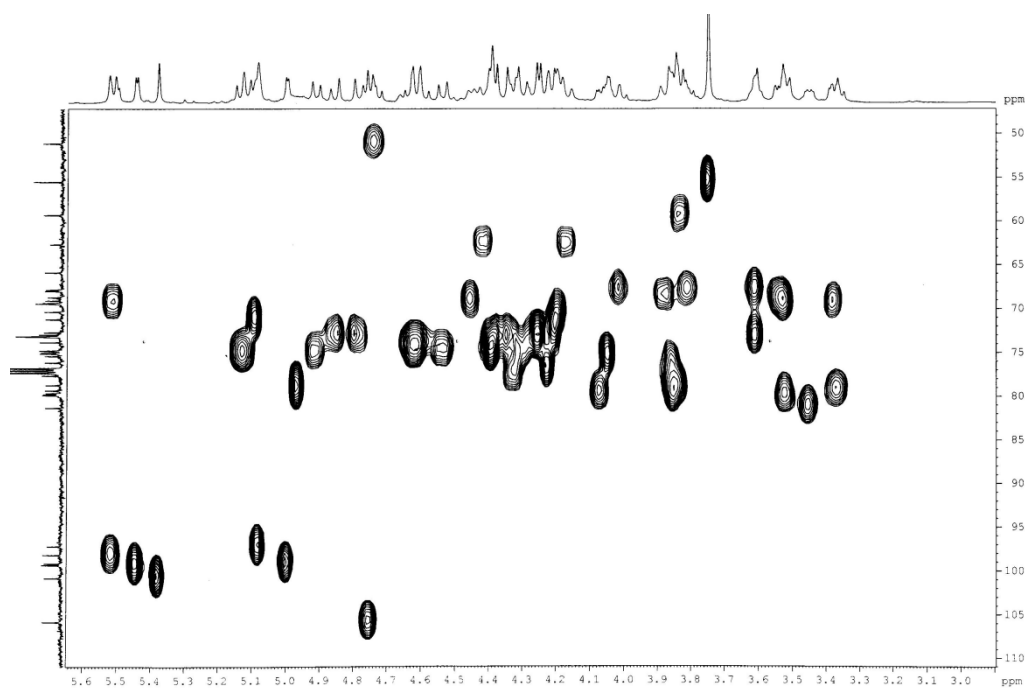

2D COSY and HSQC spectra of *p*-methoxyphenyl (3-*O*-acetyl-4,6-*O*-benzylidene-2-deoxy-2-phthalimido- $\beta$ -D-galactopyranosyl)-(1 $\rightarrow$ 3)-(2-*O*-acetyl-4-*O*-benzyl- $\alpha$ -L-rhamnopyranosyl)-(1 $\rightarrow$ 4)-(6-*O*-benzoyl-2,3-di-*O*-benzyl- $\alpha$ -D-glucopyranosyl)-(1 $\rightarrow$ 4)-(2,3,6-tri-*O*-benzyl- $\beta$ -D-galactopyranosyl)-(1 $\rightarrow$ 3)-2-azido-4,6-di-*O*-benzyl-2-deoxy- $\alpha$ -D-galactopyranoside (**13**) (CDCl<sub>3</sub>) (selected regions).



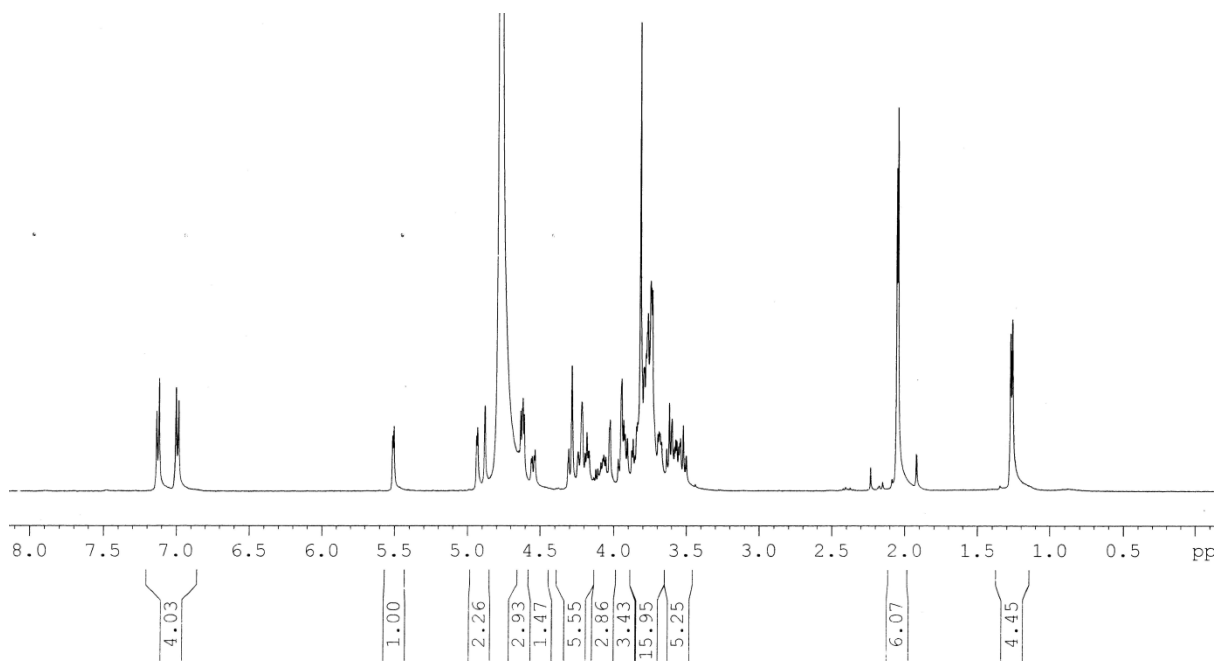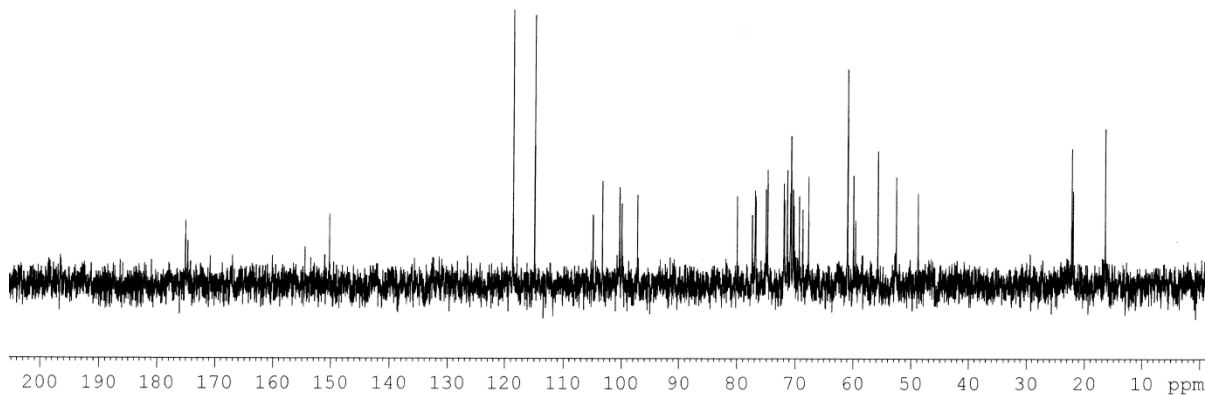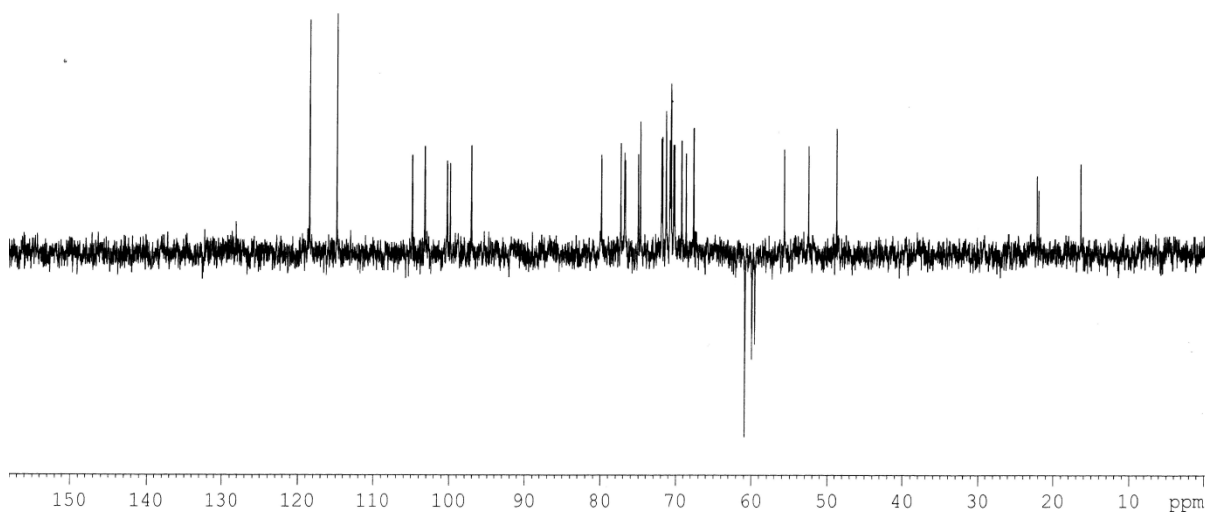

<sup>1</sup>H, <sup>13</sup>C and DEPT 135 NMR spectra of *p*-methoxyphenyl (2-acetamido-2-deoxy-β-D-galactopyranosyl)-(1→3)-(α-L-rhamnopyranosyl)-(1→4)-(α-D-glucopyranosyl)-(1→4)-(β-D-galactopyranosyl)-(1→3)-2-acetamido-2-deoxy-α-D-galactopyranoside (**1**) (D<sub>2</sub>O).

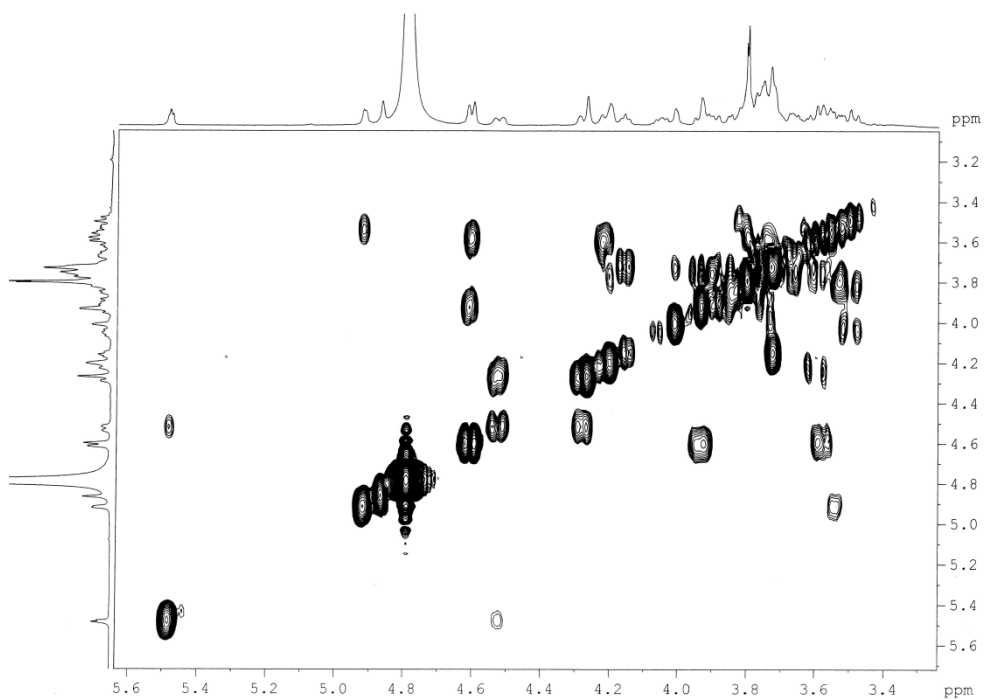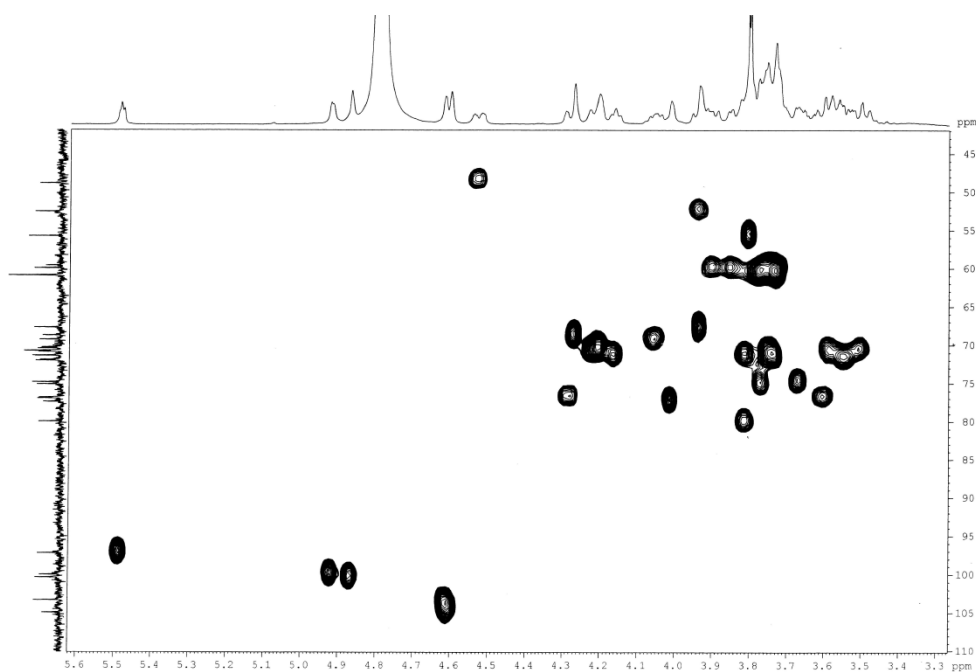

2D COSY and HSQC spectra of *p*-methoxyphenyl (2-acetamido-2-deoxy- $\beta$ -D-galactopyranosyl)-(1 $\rightarrow$ 3)-( $\alpha$ -L-rhamnopyranosyl)-(1 $\rightarrow$ 4)-( $\alpha$ -D-glucopyranosyl)-(1 $\rightarrow$ 4)-( $\beta$ -D-galactopyranosyl)-(1 $\rightarrow$ 3)-2-acetamido-2-deoxy- $\alpha$ -D-galactopyranoside (**1**) (D<sub>2</sub>O) (selected regions).
